# Supplementary material
Source: publisher site journal article supplement (https://www.dovepress.com/get_supplementary_file.php?f=476649.docx)
Supplement: Supplementary file 1 [file get_supplementary_file.php]

**Supplementary files**

**
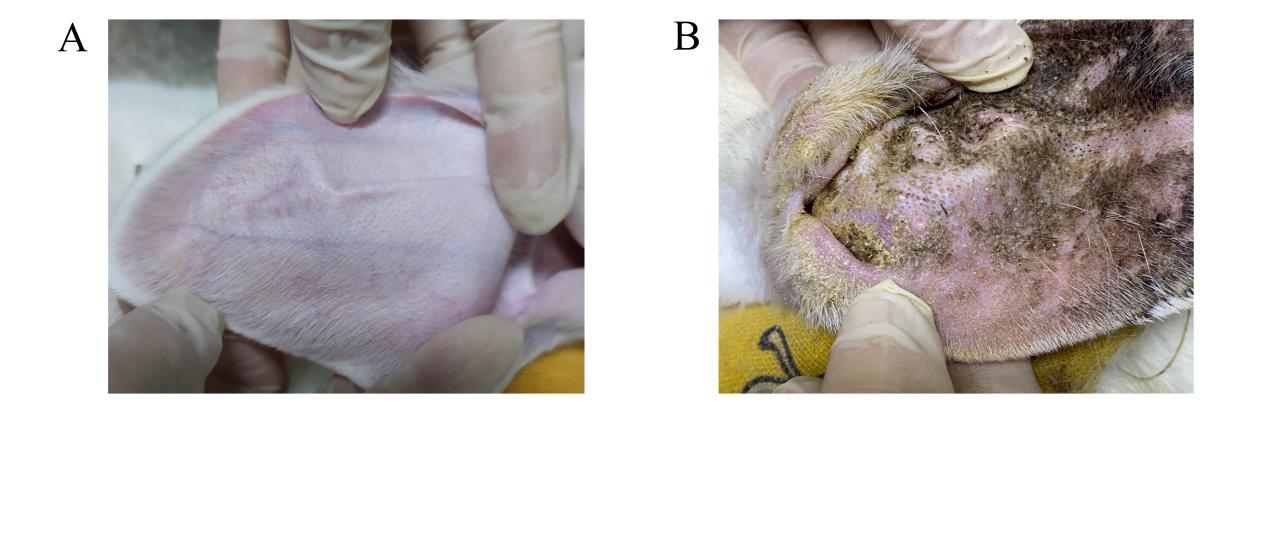
**

**Supplementary Figure 1.** Establishment of the rabbit ear model of acne. (A) The normal ear. (B) Rabbit ear model of acne.

Table S1: Differential lipid metabolites were identified between group C and group M

| **name** | **Class** | **VIP** | **Fold Change** | **P** | **CalMz** | **RT-(min)** |
| --- | --- | --- | --- | --- | --- | --- |
| Cer(t17:0_16:0) | Cer | 1.812335044 | 0.354695844 | 9.17854E-06 | 586.5052125 | 9.626618233 |
| Cer(t17:1_16:0) | Cer | 1.367932772 | 0.112207776 | 3.63745E-08 | 538.4840825 | 9.123620576 |
| Cer(t18:0_16:0) | Cer | 1.664806345 | 0.14324021 | 8.1147E-07 | 554.5153825 | 10.25939349 |
| Cer(t18:1_16:0) | Cer | 4.410295855 | 0.13441252 | 4.52536E-06 | 598.5052125 | 9.763430324 |
| Cer(t35:1+O) | Cer | 5.058672518 | 0.296326324 | 2.26182E-08 | 628.5157775 | 10.28704111 |
| Cer(t18:0_19:0+O) | Cer | 1.2096529 | 31.21311726 | 1.21572E-05 | 658.5627275 | 9.206917122 |
| Cer(t37:1+O) | Cer | 2.357139884 | 0.428840124 | 6.99918E-06 | 610.5415975 | 11.48697139 |
| Cer(t18:0_20:0) | Cer | 1.182359128 | 0.267406184 | 2.02529E-06 | 656.5834625 | 12.06238826 |
| Cer(t39:1+O) | Cer | 1.754729036 | 0.45658609 | 1.44362E-06 | 638.5728975 | 12.6438709 |
| Cer(t18:0_22:0) | Cer | 1.415896686 | 0.391782266 | 5.51946E-06 | 684.6147625 | 13.18001304 |
| Cer(t18:0_22:0+O) | Cer | 1.277539925 | 0.148556085 | 2.82332E-06 | 700.6096775 | 12.73751607 |
| Cer(t18:1_22:0) | Cer | 1.148669512 | 0.102224633 | 3.02454E-08 | 682.5991125 | 12.06694944 |
| Cer(t18:1_22:0) | Cer | 1.106534533 | 0.089189462 | 1.15636E-07 | 682.5991125 | 13.23784157 |
| Cer(t17:0_24:0) | Cer | 1.911605478 | 0.309237431 | 1.6875E-06 | 698.6304125 | 13.73171327 |
| Cer(t17:0_24:0+O) | Cer | 1.221583439 | 0.353909544 | 7.37818E-05 | 714.6253275 | 12.21757615 |
| Cer(t16:0_25:0+O) | Cer | 1.752565958 | 0.079192388 | 6.85883E-06 | 714.6253275 | 13.34216789 |
| Cer(t41:0+O) | Cer | 2.77325935 | 0.18186776 | 2.05774E-06 | 714.6253275 | 14.17247191 |
| Cer(t17:1_24:0) | Cer | 1.683016862 | 0.089018242 | 4.77545E-08 | 696.6147625 | 12.62565719 |
| Cer(t17:1_24:0) | Cer | 1.418674643 | 0.041321867 | 5.31082E-06 | 696.6147625 | 13.84536794 |
| Cer(t41:1+O) | Cer | 3.400210015 | 0.22231931 | 1.55653E-07 | 666.6041975 | 13.73734575 |
| Cer(t18:0_24:0) | Cer | 1.527580541 | 0.469006289 | 0.000434158 | 712.6460625 | 13.57470209 |
| Cer(t18:0_24:0) | Cer | 3.665941674 | 0.147364114 | 3.62832E-07 | 712.6460625 | 14.22129737 |
| Cer(t18:0_24:0) | Cer | 1.507271353 | 0.046387784 | 0.000315335 | 712.6460625 | 14.87579479 |
| Cer(t42:0) | Cer | 1.330745012 | 0.091871906 | 9.86029E-07 | 712.6460625 | 15.413 |
| Cer(t18:0_24:0+O) | Cer | 1.820403169 | 0.340383605 | 9.61741E-05 | 728.6409775 | 12.49465425 |
| Cer(t18:1_24:0) | Cer | 2.690089725 | 0.07023746 | 1.14993E-07 | 710.6304125 | 13.16185526 |
| Cer(t17:1_25:0) | Cer | 2.449768286 | 0.03410061 | 6.26114E-05 | 710.6304125 | 14.34241912 |
| Cer(t18:1_24:0+O) | Cer | 1.323421047 | 0.058625066 | 2.61949E-06 | 726.6253275 | 12.56601801 |
| Cer(t42:1+O) | Cer | 3.377406849 | 0.111604724 | 1.01852E-08 | 680.6198475 | 14.18695733 |
| Cer(t17:0_26:0) | Cer | 2.16352177 | 0.281678823 | 5.3357E-07 | 726.6617125 | 14.70905185 |
| Cer(t18:0_25:0) | Cer | 1.075790711 | 0.058763395 | 7.88117E-05 | 726.6617125 | 15.11332869 |
| Cer(t17:0_26:0+O) | Cer | 1.694233212 | 0.2958592 | 9.67702E-07 | 742.6566275 | 13.29637981 |
| Cer(t17:0_26:0+O) | Cer | 1.2301779 | 0.082674336 | 8.13582E-05 | 742.6566275 | 14.21154681 |
| Cer(t17:1_26:0) | Cer | 1.779519761 | 0.064345825 | 7.72927E-09 | 724.6460625 | 13.64618967 |
| Cer(t18:1_25:0) | Cer | 1.593355209 | 0.034126917 | 2.60806E-05 | 724.6460625 | 14.78620189 |
| Cer(t17:1_26:0+O) | Cer | 1.009219945 | 0.125935937 | 1.0206E-07 | 740.6409775 | 12.27760462 |
| Cer(t17:1_26:0+O) | Cer | 1.202457258 | 0.132650006 | 8.06427E-07 | 740.6409775 | 13.24138247 |
| Cer(t43:1+O) | Cer | 5.594736888 | 0.083304339 | 2.12526E-06 | 740.6409775 | 14.65691505 |
| Cer(t18:0_26:0) | Cer | 1.353520989 | 0.581041669 | 0.013165335 | 740.6773625 | 14.64353101 |
| Cer(t18:0_26:0) | Cer | 3.671374066 | 0.091903812 | 8.47631E-07 | 740.6773625 | 15.11821309 |
| Cer(t18:0_26:0) | Cer | 1.439478377 | 0.058363652 | 8.52649E-05 | 740.6773625 | 15.51975148 |
| Cer(t18:0_26:0+O) | Cer | 2.275088568 | 0.089193563 | 3.32856E-06 | 756.6722775 | 13.82030165 |
| Cer(t18:0_26:0+O) | Cer | 1.155320905 | 0.062008755 | 0.00050786 | 756.6722775 | 14.01391444 |
| Cer(t18:0_26:0+O) | Cer | 1.994243495 | 0.216162184 | 0.000939461 | 756.6722775 | 14.71139336 |
| Cer(t18:1_26:0) | Cer | 2.333160404 | 0.035172872 | 2.23412E-06 | 738.6617125 | 14.18254503 |
| Cer(t18:0_26:1) | Cer | 2.244218788 | 0.024631013 | 5.42261E-05 | 738.6617125 | 15.1676088 |
| Cer(t18:1_26:0+O) | Cer | 1.218280952 | 0.040889242 | 2.44198E-07 | 754.6566275 | 12.7929396 |
| Cer(t18:1_26:0+O) | Cer | 1.377121985 | 0.049962198 | 6.03623E-06 | 754.6566275 | 13.7413382 |
| Cer(t44:1+O) | Cer | 3.36077896 | 0.05344888 | 2.29211E-07 | 754.6566275 | 14.83060168 |
| Cer(t45:0+O) | Cer | 1.079532903 | 0.238817409 | 2.31135E-05 | 770.6879275 | 14.30856493 |
| Cer(t45:1) | Cer | 1.022021948 | 0.037299607 | 4.02502E-05 | 752.6773625 | 15.39363538 |
| Cer(t20:0_26:0) | Cer | 2.383993804 | 0.128988532 | 3.13273E-06 | 768.7086625 | 15.74049744 |
| Cer(t20:0_26:0+O) | Cer | 1.604309738 | 0.060077681 | 4.74791E-06 | 784.7035775 | 14.7522555 |
| Cer(t46:0+O) | Cer | 1.591763417 | 0.034343746 | 7.13063E-06 | 784.7035775 | 15.44120542 |
| Cer(t20:0_26:1) | Cer | 1.449006936 | 0.033358499 | 1.32771E-05 | 766.6930125 | 15.03754685 |
| Cer(t20:0_26:1) | Cer | 1.14455016 | 0.031512143 | 0.000111716 | 766.6930125 | 15.73609963 |
| CL(90:2)-2H | CL | 1.038658478 | 0.688362689 | 0.001179361 | 855.666639 | 11.36 |
| FA(20:4) | FA | 1.281838551 | 0.678562161 | 0.025517306 | 303.2329535 | 3.293106723 |
| Hex1Cer(d15:1_18:1) | Hex1Cer | 1.200060652 | 0.395227958 | 0.00035234 | 728.5318225 | 10.03905817 |
| Hex1Cer(t17:0_20:4) | Hex1Cer | 1.83215531 | 0.580959087 | 5.66107E-05 | 750.5525575 | 11.09 |
| Cer(d17:1_15:0+O) | Cer | 1.216505425 | 0.189475317 | 1.73123E-07 | 570.4739125 | 8.488826973 |
| LPA(18:0) | LPA | 3.17967172 | 0.217735797 | 9.51307E-05 | 437.2673665 | 2.129745751 |
| LPC(16:0) | LPC | 1.797203167 | 0.20311148 | 0.000203228 | 540.3306955 | 2.102176509 |
| LPC(16:0) | LPC | 1.612828693 | 0.097212441 | 0.010677095 | 540.3306955 | 2.881442496 |
| LPC(18:0) | LPC | 1.379302758 | 0.192085972 | 7.73331E-06 | 568.3619955 | 2.935803508 |
| LPC(18:1) | LPC | 1.18345531 | 0.294430576 | 0.002012298 | 566.3463455 | 2.194192658 |
| LPC(18:2) | LPC | 1.221159538 | 0.144043525 | 0.003883169 | 564.3306955 | 1.747739008 |
| LPE(16:0) | LPE | 1.150139374 | 0.182815639 | 9.27604E-06 | 452.2782655 | 2.211490066 |
| LPE(16:1e) | LPE | 1.623015187 | 0.129255448 | 0.002185092 | 436.2833505 | 2.521418134 |
| LPE(18:0) | LPE | 4.080743139 | 0.212837948 | 3.0301E-06 | 480.3095655 | 3.139252581 |
| LPE(18:0) | LPE | 4.694592206 | 0.076889186 | 2.57582E-07 | 480.3095655 | 3.729173688 |
| LPE(18:1) | LPE | 1.369210703 | 0.432169236 | 0.002467767 | 478.2939155 | 2.309025018 |
| LPE(18:1e) | LPE | 1.489143087 | 0.124847709 | 0.001173162 | 464.3146505 | 3.572411208 |
| LPE(18:1e) | LPE | 1.490037868 | 0.079147231 | 0.002315114 | 464.3146505 | 4.035 |
| LPE(18:2) | LPE | 1.165365338 | 0.221263771 | 0.000183025 | 476.2782655 | 1.816687271 |
| LPE(18:2e) | LPE | 1.23231172 | 0.312591194 | 0.000499963 | 462.2990005 | 2.615493021 |
| Cer(d33:1+2O) | Cer | 1.045403335 | 0.046249021 | 7.27818E-07 | 600.4844775 | 7.70943981 |
| Cer(d33:1+O) | Cer | 2.336498247 | 0.100206154 | 3.68181E-08 | 584.4895625 | 9.125022412 |
| OAHFA(18:2_29:0) | OAHFA | 1.408859825 | 0.023158044 | 2.48258E-11 | 715.6609835 | 15.993 |
| OAHFA(18:1_32:1) | OAHFA | 1.113243072 | 0.214662713 | 2.64086E-06 | 757.7079335 | 16.57007678 |
| OAHFA(18:2_32:1) | OAHFA | 1.371222518 | 0.052172927 | 6.30491E-08 | 755.6922835 | 16.19445725 |
| OAHFA(18:2_34:1) | OAHFA | 1.280568738 | 0.107270837 | 2.31179E-07 | 783.7235835 | 16.57393994 |
| OAHFA(18:2_34:2) | OAHFA | 1.035188806 | 0.03821389 | 1.62788E-07 | 781.7079335 | 16.26561122 |
| Cer(d18:0_16:0) | Cer | 3.342930817 | 0.150508913 | 1.46969E-08 | 584.5259475 | 10.71989064 |
| Cer(d21:0_13:0) | Cer | 1.077949887 | 0.201872707 | 0.012269534 | 584.5259475 | 11.21194989 |
| PA(18:0_18:1) | PA | 1.806071372 | 0.370552452 | 0.000204859 | 701.5126815 | 10.08720197 |
| PA(18:0_18:2) | PA | 2.347447639 | 0.328242947 | 0.000327641 | 699.4970315 | 9.19409349 |
| PA(18:0_18:2) | PA | 2.581314146 | 0.00503908 | 0.017909011 | 699.4970315 | 9.796 |
| PA(20:0_18:1) | PA | 1.127034686 | 0.399171313 | 4.54963E-05 | 729.5439815 | 11.22772082 |
| PA(20:0_18:2) | PA | 2.151891082 | 0.38885904 | 0.001343335 | 727.5283315 | 10.32217246 |
| PA(20:1_18:1) | PA | 1.078435946 | 2.616752061 | 0.026701819 | 727.5283315 | 11.14313055 |
| PA(20:1_18:2) | PA | 2.277217009 | 0.408439997 | 0.010117627 | 725.5126815 | 9.288719244 |
| PA(38:4) | PA | 1.015979653 | 0.252974938 | 0.004214923 | 723.4970315 | 8.416365384 |
| PA(18:0_20:4) | PA | 1.217633937 | 0.370067676 | 0.003824774 | 723.4970315 | 8.96796043 |
| Cer(d34:0+O) | Cer | 3.72767671 | 0.155227772 | 1.12252E-06 | 600.5208625 | 10.27551035 |
| PC(16:0_16:0) | PC | 3.760072998 | 0.428098004 | 6.24387E-07 | 778.5603605 | 10.02200395 |
| PC(16:0e_16:0) | PC | 1.411109197 | 0.194999648 | 1.58503E-07 | 764.5810955 | 10.7705048 |
| PC(14:1e_18:2) | PC | 1.692289687 | 0.41907468 | 3.06743E-06 | 698.5130155 | 10.14540236 |
| PC(18:0_16:0) | PC | 1.688940431 | 0.311336715 | 7.8722E-09 | 806.5916605 | 11.20580779 |
| PC(16:0_18:1) | PC | 2.195531205 | 0.498620672 | 0.00053589 | 804.5760105 | 11.48087717 |
| PC(18:1e_16:0) | PC | 1.048557559 | 0.508917898 | 6.40061E-05 | 790.5967455 | 10.82560508 |
| PC(16:0_18:2) | PC | 1.460507243 | 0.714901414 | 0.0107375 | 802.5603605 | 9.205873599 |
| PC(16:0_18:2) | PC | 2.792507901 | 0.248411416 | 0.001612199 | 802.5603605 | 9.718935047 |
| PC(18:2e_16:0) | PC | 1.253531966 | 0.243361107 | 2.22507E-06 | 788.5810955 | 9.93657543 |
| PC(34:4)-CH3 | PC | 1.119468145 | 0.223131723 | 0.00011241 | 738.5079305 | 8.65 |
| PC(16:0_20:1) | PC | 1.035384409 | 0.696008522 | 0.003492107 | 832.6073105 | 11.30152307 |
| PC(18:1_18:1) | PC | 1.992418572 | 0.614849593 | 0.000230143 | 830.5916605 | 10.35601317 |
| Cer(d34:1+2O) | Cer | 1.169324454 | 0.03249401 | 1.44642E-07 | 614.5001275 | 7.830403565 |
| Cer(d34:1+2O) | Cer | 1.741938303 | 0.276399357 | 1.2136E-08 | 568.4946475 | 9.826705296 |
| PC(18:2e_22:0) | PC | 1.197243686 | 355.8107947 | 0.011085504 | 872.6749955 | 14.326 |
| Cer(d18:1_16:0+O) | Cer | 2.224294962 | 0.13677202 | 5.27762E-06 | 552.4997325 | 9.762865545 |
| PE(15:0_18:2) | PE | 1.249954198 | 0.296902502 | 0.000146672 | 700.4922805 | 8.856951445 |
| PE(16:0_18:1) | PE | 1.509080433 | 0.287122562 | 3.02499E-08 | 716.5235805 | 10.48220093 |
| PE(16:0_18:1) | PE | 1.8512665 | 0.001274413 | 2.36094E-06 | 716.5235805 | 11.774 |
| PE(16:1e_18:2) | PE | 1.545663146 | 0.412656219 | 1.70415E-06 | 698.5130155 | 10.12535649 |
| PE(18:0_18:1) | PE | 2.071915005 | 0.481267797 | 0.000374431 | 744.5548805 | 11.63927616 |
| PE(18:0_18:1) | PE | 1.449378582 | 0.210239711 | 0.000745325 | 744.5548805 | 12.054 |
| PE(18:0_18:1) | PE | 2.23039739 | 0.375667804 | 8.09655E-05 | 744.5548805 | 12.737 |
| PE(18:1_18:2) | PE | 1.113703148 | 0.494724365 | 0.001219905 | 740.5235805 | 9.643553877 |
| PE(36:3e) | PE | 1.009672794 | 3.705948889 | 0.000927641 | 726.5443155 | 10.717 |
| PE(18:2_18:2) | PE | 1.002911388 | 0.218487599 | 0.000141791 | 738.5079305 | 8.782594857 |
| PE(16:1e_20:4) | PE | 2.041315126 | 0.573207088 | 1.45329E-05 | 722.5130155 | 9.906716371 |
| PE(16:1e_20:4) | PE | 1.831267351 | 0.544062173 | 0.002350769 | 722.5130155 | 10.317 |
| Cer(d16:0_19:0) | Cer | 1.166658201 | 0.338530928 | 5.26259E-05 | 598.5415975 | 11.27890112 |
| PE(18:0_20:4) | PE | 1.779906407 | 0.450131402 | 6.76207E-05 | 766.5392305 | 10.52844051 |
| PE(16:1e_22:4) | PE | 2.348201271 | 0.495029085 | 1.87369E-05 | 750.5443155 | 10.96609983 |
| PE(18:1e_22:4) | PE | 1.002672543 | 0.479683412 | 0.000179404 | 778.5756155 | 11.93188352 |
| Cer(d17:1_18:0) | Cer | 1.864190909 | 0.26298859 | 3.85986E-08 | 596.5259475 | 10.84921918 |
| PI(18:0_20:4) | PI | 1.528421296 | 0.51280899 | 0.000661804 | 885.5498565 | 9.024723202 |
| PS(18:1_18:1) | PS | 1.502553718 | 0.748485457 | 0.035920721 | 786.5290605 | 9.376570208 |
| Cer(d17:1_18:2) | Cer | 2.528703186 | 0.024456521 | 1.20672E-06 | 592.4946475 | 8.828820435 |
| SM(d34:0) | SM | 1.737763127 | 0.400936977 | 3.00409E-09 | 749.5814295 | 9.259940981 |
| SM(d34:1) | SM | 3.248497712 | 0.5276458 | 4.8827E-06 | 747.5657795 | 8.789553803 |
| SM(d34:1) | SM | 3.176616912 | 0.215750983 | 0.005187896 | 747.5657795 | 9.258 |
| SM(d40:0) | SM | 1.167902282 | 0.338694991 | 8.07171E-05 | 833.6753295 | 12.82689448 |
| SM(d40:1) | SM | 1.53130352 | 0.696136569 | 0.005014704 | 831.6596795 | 12.41608779 |
| SM(d41:1) | SM | 1.115519897 | 0.688537306 | 0.000953326 | 845.6753295 | 12.96048071 |
| SM(d42:0) | SM | 1.462527583 | 0.219476801 | 2.57948E-05 | 861.7066295 | 13.86134642 |
| SM(d42:1) | SM | 2.437244076 | 0.516862336 | 0.000274359 | 859.6909795 | 13.4815113 |
| SM(d42:2) | SM | 1.773300976 | 0.766166071 | 0.039251404 | 857.6753295 | 12.33793576 |
| SM(d42:3) | SM | 1.56446594 | 0.642454054 | 0.000748113 | 855.6596795 | 11.37113999 |
| SM(t34:1) | SM | 1.173497222 | 0.57511258 | 8.17668E-05 | 763.5606945 | 8.292620871 |
| SPHP(m22:1) | SPHP | 1.989708116 | 0.109601306 | 0.001542881 | 464.3146505 | 3.576451768 |
| Cer(d18:0_18:1) | Cer | 1.079947931 | 0.094680788 | 5.04393E-05 | 610.5415975 | 10.87724077 |
| Cer(d18:1_18:0) | Cer | 2.431306899 | 0.422660993 | 5.2059E-06 | 610.5415975 | 11.52668264 |
| Cer(d36:1) | Cer | 1.333224944 | 17.91344135 | 0.030827066 | 610.5415975 | 12.19334153 |
| Cer(d18:1_18:0) | Cer | 1.731772727 | 118.39814 | 0.003817581 | 610.5415975 | 12.6530757 |
| Cer(d18:0_18:2) | Cer | 1.152365037 | 0.063785337 | 7.09926E-05 | 608.5259475 | 9.921547657 |
| Cer(d18:1_18:1) | Cer | 1.231182552 | 0.289866839 | 5.06629E-05 | 608.5259475 | 10.44364799 |
| Cer(d18:1_18:2) | Cer | 1.534772806 | 0.047178067 | 1.07922E-05 | 606.5102975 | 9.462511192 |
| Cer(d16:0_21:0) | Cer | 1.821585437 | 2.36393161 | 0.001681889 | 626.5728975 | 12.49490591 |
| Cer(d37:0+O) | Cer | 1.439452924 | 7.603114758 | 0.00012553 | 642.5678125 | 10.61007579 |
| Cer(d18:1_19:0) | Cer | 1.523033475 | 0.218624751 | 8.6111E-08 | 624.5572475 | 12.04687788 |
| Cer(d37:2+2O) | Cer | 1.217923819 | 0.30339061 | 3.38945E-06 | 608.5259475 | 10.457 |
| Cer(d20:0_18:0) | Cer | 1.886111283 | 0.295783727 | 1.88799E-05 | 640.5885475 | 13.07604197 |
| Cer(d18:1_20:0) | Cer | 1.868488523 | 0.449394081 | 9.63304E-07 | 638.5728975 | 12.69077533 |
| Cer(d14:0_25:0) | Cer | 1.07419595 | 0.366179884 | 6.81752E-05 | 654.6041975 | 13.60088849 |
| Cer(d17:1_22:0) | Cer | 1.393936876 | 0.271114492 | 2.72117E-09 | 652.5885475 | 13.24913424 |
| Cer(d40:0) | Cer | 2.785060397 | 0.179366099 | 2.05562E-06 | 668.6198475 | 14.13214605 |
| Cer(d15:0_25:0) | Cer | 3.225423655 | 0.000358802 | 1.14057E-07 | 668.6198475 | 14.81201711 |
| Cer(d40:0+O) | Cer | 1.489401537 | 0.308618025 | 7.99997E-07 | 684.6147625 | 13.276 |
| Cer(d18:1_22:0) | Cer | 3.435185695 | 0.222137872 | 1.73268E-07 | 666.6041975 | 13.77401397 |
| Cer(d40:1+O) | Cer | 1.154479956 | 0.105962587 | 2.20804E-08 | 682.5991125 | 12.06500887 |
| Cer(d17:0_24:0) | Cer | 1.179447534 | 0.025261951 | 0.000135693 | 682.6354975 | 13.54552676 |
| Cer(d41:0) | Cer | 2.644063036 | 0.253732131 | 1.09617E-05 | 682.6354975 | 14.61603953 |
| Cer(d41:0+2O) | Cer | 1.170286545 | 0.349105829 | 6.62526E-05 | 714.6253275 | 12.217 |
| Cer(d17:1_24:0) | Cer | 3.374992429 | 0.106880895 | 8.54924E-09 | 680.6198475 | 14.27793493 |
| Cer(d17:1_24:0+O) | Cer | 1.642497139 | 0.089956854 | 4.70113E-08 | 696.6147625 | 12.63534789 |
| Cer(d41:1+O) | Cer | 1.418405132 | 0.040834137 | 5.26809E-06 | 696.6147625 | 13.82423307 |
| Cer(d18:0_24:0) | Cer | 5.107023961 | 0.155624943 | 7.4807E-06 | 696.6511475 | 15.03388704 |
| Cer(d42:0+2O) | Cer | 1.905945284 | 0.201235499 | 4.89151E-06 | 728.6409775 | 12.81 |
| Cer(d42:0+O) | Cer | 1.529744574 | 0.468646918 | 0.000432412 | 712.6460625 | 13.57985312 |
| Cer(d42:0+O) | Cer | 1.554154703 | 0.051571715 | 7.93838E-05 | 712.6460625 | 14.71225811 |
| Cer(d18:0_24:1) | Cer | 1.846898064 | 0.049904552 | 9.18289E-06 | 694.6354975 | 14.06010839 |
| Cer(d18:1_24:0) | Cer | 5.571719983 | 0.080045152 | 1.41118E-06 | 694.6354975 | 14.75041785 |
| Cer(d42:1) | Cer | 5.170912301 | 0.038341553 | 0.001158812 | 694.6354975 | 17.997 |
| Cer(d18:1_24:0+O) | Cer | 2.666551857 | 0.080521241 | 5.45046E-08 | 710.6304125 | 13.16726542 |
| Cer(d42:1+O) | Cer | 2.449768286 | 0.03410061 | 6.26114E-05 | 710.6304125 | 14.32794112 |
| Cer(d18:1_24:1) | Cer | 2.776678217 | 0.491990355 | 8.29789E-05 | 692.6198475 | 13.69744315 |
| Cer(d18:1_24:2) | Cer | 2.307174841 | 0.489544335 | 0.000183499 | 690.6041975 | 12.77281669 |
| Cer(d43:0) | Cer | 2.593556005 | 0.376615041 | 0.00020752 | 710.6667975 | 15.38859707 |
| Cer(d19:0_24:0+O) | Cer | 2.163590179 | 0.281734848 | 5.35389E-07 | 726.6617125 | 14.75124045 |
| Cer(d43:0+O) | Cer | 1.033932676 | 0.06918527 | 8.98538E-05 | 726.6617125 | 15.21573848 |
| Cer(d17:1_26:0) | Cer | 3.443698011 | 0.049776738 | 1.51751E-07 | 708.6511475 | 15.09597294 |
| Cer(d19:1_24:0+O) | Cer | 1.966013785 | 0.097875551 | 2.02789E-08 | 724.6460625 | 13.60692718 |
| Cer(d43:1+O) | Cer | 1.594643982 | 0.034049969 | 2.52614E-05 | 724.6460625 | 14.77906407 |
| Cer(d19:0_25:0) | Cer | 4.706991064 | 0.184239986 | 6.02029E-06 | 724.6824475 | 15.69763211 |
| Cer(d44:0+O) | Cer | 2.048631302 | 0.177108885 | 3.81551E-06 | 740.6773625 | 14.5506297 |
| Cer(d44:0+O) | Cer | 1.531786988 | 0.05912703 | 7.97262E-05 | 740.6773625 | 15.43799274 |
| Cer(d18:1_26:0) | Cer | 1.033345725 | 0.038730619 | 0.000179272 | 722.6667975 | 14.97581822 |
| Cer(d18:1_26:0) | Cer | 4.155077141 | 0.022856567 | 2.45403E-05 | 722.6667975 | 15.4878209 |
| Cer(d19:1_25:0+O) | Cer | 2.308693151 | 0.038676601 | 2.41409E-06 | 738.6617125 | 14.1581686 |
| Cer(d44:1+O) | Cer | 2.258320976 | 0.024743046 | 7.34263E-05 | 738.6617125 | 15.16930873 |
| Cer(d44:1+O) | Cer | 1.520267756 | 0.014232258 | 0.001675035 | 738.6617125 | 15.57078705 |
| Cer(d18:1_26:1) | Cer | 1.178283353 | 0.134893634 | 4.34308E-05 | 720.6511475 | 14.61536728 |
| Cer(d19:0_26:0) | Cer | 1.817216216 | 0.506968881 | 0.00351932 | 738.6980975 | 15.94350409 |
| Cer(d19:1_26:0) | Cer | 1.298092985 | 0.022933632 | 0.009896766 | 736.6824475 | 15.64505865 |
| Cer(d19:1_26:0+O) | Cer | 1.037732002 | 0.074458195 | 3.31111E-07 | 752.6773625 | 14.62098184 |
| Cer(d19:1_26:0+O) | Cer | 1.003039189 | 0.038272105 | 5.16459E-05 | 752.6773625 | 15.40270169 |
| Cer(d46:0) | Cer | 3.034073547 | 0.206131574 | 1.90831E-05 | 752.7137475 | 16.18901714 |
| Cer(d46:0) | Cer | 3.263723221 | 0.155578981 | 7.5263E-05 | 752.7137475 | 16.6 |
| Cer(d46:0+O) | Cer | 2.33939891 | 0.129851899 | 3.1838E-06 | 768.7086625 | 15.71522503 |
| Cer(d20:1_26:0) | Cer | 2.316618376 | 0.028575503 | 3.67767E-05 | 750.6980975 | 15.98038862 |
| Cer(d46:1+O) | Cer | 1.449179288 | 0.033118283 | 1.31986E-05 | 766.6930125 | 15.03978394 |
| Cer(d46:1+O) | Cer | 1.229574525 | 0.031157677 | 0.000106962 | 766.6930125 | 15.77856824 |
| Cer(d22:0_25:0) | Cer | 1.026817716 | 0.492996558 | 0.00191703 | 766.7293975 | 16.40075059 |
| Cer(d21:0_26:1) | Cer | 1.080706703 | 0.033000286 | 4.27441E-07 | 764.7137475 | 16.18006377 |
| Cer(d23:0_25:0) | Cer | 1.584118128 | 0.329800844 | 4.17831E-05 | 780.7450475 | 16.58478401 |
| Cer(d48:0+O) | Cer | 1.309365953 | 0.140776087 | 4.18336E-07 | 796.7399625 | 16.15099496 |
| Cer(d22:1_26:0) | Cer | 1.332392794 | 0.022015906 | 1.44623E-05 | 778.7293975 | 16.43728101 |
| Cer(d50:2+O) | Cer | 1.269963139 | 0.012453635 | 3.59905E-06 | 820.7399625 | 13.63004899 |
| Cer(m34:0+O) | Cer | 1.084794228 | 0.203168279 | 0.010981691 | 584.5259475 | 10.9442651 |
| Cer(m36:0+O) | Cer | 2.143385296 | 0.287286276 | 5.83727E-06 | 612.5572475 | 11.92951465 |
| Cer(m20:0_16:1+O) | Cer | 1.067478412 | 0.09432461 | 5.0689E-05 | 610.5415975 | 10.88611687 |
| Cer(m20:0_16:1+O) | Cer | 2.357139884 | 0.428840124 | 6.99918E-06 | 610.5415975 | 11.51297309 |
| Cer(m36:2+2O) | Cer | 1.403505811 | 0.033433136 | 8.22915E-06 | 624.5208625 | 8.835 |
| Cer(m37:0+O) | Cer | 1.821585437 | 2.36393161 | 0.001681889 | 626.5728975 | 12.52557704 |
| Cer(m37:1+O) | Cer | 1.225278106 | 0.271742675 | 2.90601E-08 | 624.5572475 | 12.111 |
| Cer(m38:0+O) | Cer | 1.874173161 | 0.297348871 | 1.61807E-05 | 640.5885475 | 13.07281777 |
| Cer(m39:0+O) | Cer | 1.074294251 | 0.366155653 | 6.79474E-05 | 654.6041975 | 13.65 |
| Cer(m40:0+O) | Cer | 1.737836675 | 0.052669065 | 0.04483792 | 668.6198475 | 14.34777188 |
| Cer(m41:0+O) | Cer | 2.59169158 | 0.260698679 | 1.62452E-05 | 682.6354975 | 14.61357887 |
| Cer(m43:0+O) | Cer | 2.728913889 | 0.364612156 | 0.00018493 | 710.6667975 | 15.40209442 |
| Cer(m22:1_22:0+O) | Cer | 1.020485344 | 0.038542655 | 0.000247634 | 722.6667975 | 14.9400328 |
| Cer(m44:1+O) | Cer | 4.108261361 | 0.023733451 | 2.43542E-05 | 722.6667975 | 15.47665788 |
| Cer(m45:0+O) | Cer | 2.626994021 | 0.221032606 | 1.0188E-05 | 738.6980975 | 15.86267242 |
| Cer(m45:1+O) | Cer | 1.849995859 | 0.025100114 | 3.10866E-05 | 736.6824475 | 15.77417629 |
| Cer(m46:0+O) | Cer | 3.013879895 | 0.205906589 | 1.91184E-05 | 752.7137475 | 16.1924448 |
| Cer(m22:1_24:0+O) | Cer | 2.299390582 | 0.02811446 | 3.65971E-05 | 750.6980975 | 16.04002211 |
| Cer(m47:0+O) | Cer | 1.018374458 | 0.492769738 | 0.001935542 | 766.7293975 | 16.38602011 |
| Cer(m47:1+O) | Cer | 1.080706703 | 0.033000286 | 4.27441E-07 | 764.7137475 | 16.20427522 |
| Cer(m48:0+O) | Cer | 1.573258945 | 0.330070161 | 4.21643E-05 | 780.7450475 | 16.58404936 |
| Cer(m48:1+O) | Cer | 1.341688158 | 0.021996934 | 1.1274E-05 | 778.7293975 | 16.36402273 |
| Cer(t18:0_24:0) | Cer | 1.618045148 | 0.066179177 | 4.36831E-07 | 668.6551355 | 14.68296892 |
| CerP(m22:0_25:1) | CerP | 1.314086461 | 2.136835249 | 0.000480638 | 766.6836735 | 15.884 |
| ChE(23:0) | ChE | 1.522534238 | 0.268172383 | 0.022047203 | 723.7013565 | 12.638 |
| ChE(2:0) | ChE | 2.234122209 | 0.17519985 | 0.028957989 | 429.3727065 | 4.901225965 |
| ChE(36:0) | ChE | 2.240942679 | 2.725392676 | 0.028298488 | 905.9048065 | 16.215 |
| DG(28:1e)+Na | DG | 1.168595698 | 2.364700246 | 0.000989608 | 519.4383815 | 15.38059481 |
| DG(30:1e)+Na | DG | 1.343149765 | 1.724297324 | 0.005135841 | 547.4696815 | 15.90893824 |
| DG(30:4e) | DG | 1.168595698 | 2.364700246 | 0.000989608 | 519.4407865 | 15.39787504 |
| DG(12:0e_19:1) | DG | 2.960072908 | 0.136472982 | 6.47511E-06 | 556.5299355 | 10.23877022 |
| DG(32:4e) | DG | 1.356204146 | 1.734633902 | 0.004713084 | 547.4720865 | 16.0833354 |
| DG(34:4e) | DG | 1.550613286 | 0.364215355 | 0.001931993 | 575.5033865 | 9.159037964 |
| DG(14:1e_22:2) | DG | 1.569739131 | 0.376719201 | 0.000316911 | 627.5322815 | 8.983654732 |
| DG(38:6e) | DG | 1.590218076 | 0.401914566 | 0.000597445 | 627.5346865 | 8.986921053 |
| DG(36:1_18:1) | DG | 1.534791976 | 2.00001919 | 0.009169022 | 890.8535005 | 17.61402007 |
| Hex1Cer(d16:1_22:0+O) | Hex1Cer | 1.85091251 | 0.215258291 | 3.39296E-05 | 772.6297105 | 11.08950564 |
| Hex1Cer(m43:1) | Hex1Cer | 2.471959524 | 2.678670906 | 0.000142762 | 792.7075655 | 15.377 |
| LPC(15:0) | LPC | 1.412207342 | 0.33809294 | 1.30221E-06 | 482.3241185 | 3.099053991 |
| LPC(32:0) | LPC | 1.984366431 | 0.229434541 | 5.28384E-09 | 720.5901685 | 10.75673063 |
| LPG(11:0)+Na | LPG | 1.690572811 | 2.400967011 | 9.19563E-09 | 437.1910945 | 1.246215795 |
| MG(18:2e) | MG | 1.155339019 | 0.339852344 | 1.71171E-05 | 341.3050215 | 2.94179062 |
| PC(8:0e_10:0) | PC | 1.242962369 | 0.237582505 | 2.69322E-07 | 524.3710685 | 2.931931351 |
| PC(8:1e_10:0) | PC | 1.066439073 | 0.307691762 | 0.001208505 | 522.3554185 | 2.161663878 |
| PC(15:0_18:2) | PC | 1.339227402 | 0.418448043 | 0.000100769 | 744.5537835 | 10.59931224 |
| PE(12:0e_6:0) | PE | 2.487487425 | 0.308181752 | 1.97867E-05 | 482.3241185 | 3.095107243 |
| PE(12:0p_6:0) | PE | 1.061708073 | 0.499038219 | 0.011027927 | 480.3084685 | 2.298474603 |
| PE(19:0e) | PE | 3.328688082 | 0.22211016 | 7.14319E-05 | 496.3397685 | 2.366 |
| PE(16:0p_18:2) | PE | 1.397258616 | 0.503298389 | 3.19708E-05 | 700.5275685 | 9.986692312 |
| PE(16:0p_18:2) | PE | 1.626533363 | 0.3752562 | 5.8493E-06 | 700.5275685 | 10.46933221 |
| PE(35:0) | PE | 4.961476982 | 0.513505906 | 2.6297E-07 | 734.5694335 | 10.028 |
| PE(18:0_18:1) | PE | 2.084497418 | 0.4823624 | 0.000481265 | 746.5694335 | 10.4363595 |
| PE(18:1p_18:1) | PE | 1.640531716 | 2.121335138 | 0.028721279 | 728.5588685 | 11.12444972 |
| PE(16:0p_20:4) | PE | 1.597900762 | 0.626834862 | 0.000303171 | 724.5275685 | 9.870693665 |
| PE(37:2e) | PE | 1.041686264 | 1.622948957 | 0.021560825 | 744.5901685 | 10.64855796 |
| PE(16:0p_22:4) | PE | 1.776110907 | 0.63523622 | 0.001336749 | 752.5588685 | 10.96306152 |
| PE(18:0p_20:4) | PE | 1.275511864 | 0.712354886 | 0.01231594 | 752.5588685 | 11.38798218 |
| PG(29:2e) | PG | 1.978445782 | 1.624104726 | 1.28714E-05 | 680.4860985 | 10.36806621 |
| PG(18:2e_13:0) | PG | 2.685881822 | 2.179474614 | 0.00010087 | 708.5173985 | 10.3536732 |
| PG(31:2e) | PG | 2.604249733 | 43.24385391 | 0.010857998 | 708.5173985 | 10.84285633 |
| PG(16:0_18:1) | PG | 1.394823839 | 1.406412095 | 0.013928263 | 766.5592635 | 9.527 |
| PG(16:2e_19:0) | PG | 4.324447501 | 53.70855954 | 0.002983506 | 764.5799985 | 11.133 |
| PI(18:0_20:4) | PI | 1.00269924 | 0.370633437 | 0.002359277 | 887.5644095 | 9.395909489 |
| SM(d18:0_16:0) | SM | 1.506607753 | 0.106455587 | 1.44031E-06 | 705.5905025 | 9.731338957 |
| SPH(d18:1) | SPH | 2.010328683 | 0.217511746 | 3.97427E-08 | 300.2897055 | 1.885160839 |
| SPH(d20:0) | SPH | 1.479458513 | 0.374865115 | 0.000383677 | 330.3366555 | 2.945348484 |
| TG(37:6)+Na | TG | 1.420036782 | 0.677000613 | 0.00023882 | 663.4595115 | 10.376 |
| Cer(d18:0_26:0+O) | Cer | 1.102320428 | 0.122560098 | 2.91734E-06 | 696.6864355 | 15.13054813 |
| TG(16:1_14:1_14:1) | TG | 1.074878647 | 2.228041484 | 0.00860049 | 762.6606155 | 14.67770738 |
| TG(16:1_14:1_16:1) | TG | 1.821795882 | 1.582923314 | 0.040240534 | 790.6919155 | 15.38796944 |
| TG(16:1_14:1_18:2) | TG | 1.479701159 | 2.204977455 | 0.001439032 | 816.7075655 | 15.51281116 |
| TG(16:1_16:1_18:2) | TG | 1.621389341 | 1.585392737 | 0.005876439 | 844.7388655 | 16.01303634 |
| TG(18:1_14:1_18:3) | TG | 1.157136015 | 3.118199596 | 0.004111867 | 842.7232155 | 15.59588326 |
| TG(16:0_18:2_18:3) | TG | 1.888402302 | 2.173166204 | 0.002998898 | 870.7545155 | 16.05663867 |
| TG(18:2_18:2_18:2) | TG | 2.286186225 | 0.015600798 | 0.019020485 | 896.7701655 | 17.99390347 |
| WE(3:0_13:0) | WE | 2.256630273 | 1.113971798 | 0.023955114 | 274.2740555 | 1.27303964 |
| WE(20:0) | WE | 1.064197647 | 0.351085374 | 0.000207512 | 330.3366555 | 3.862 |
| WE(26:2_22:2) | WE | 1.622621193 | 0.086416158 | 1.0683E-06 | 697.6857065 | 15.066 |
| ZyE(24:7) | ZyE | 45.6127684 | 0.409869025 | 0.002277059 | 721.5918065 | 10.75971887 |
| ZyE(24:7) | ZyE | 12.30624031 | 9.182170676 | 0.01348008 | 738.6183555 | 12.117 |
| ZyE(2:0) | ZyE | 3.380586451 | 0.079057533 | 0.015599173 | 427.3570565 | 3.760885981 |
| ZyE(32:6) | ZyE | 4.00167182 | 4.726451578 | 0.002978857 | 852.7592055 | 14.84072705 |
| ZyE(33:5) | ZyE | 5.349727184 | 7.803640677 | 0.016483096 | 868.7905055 | 15.59 |
| ZyE(33:6) | ZyE | 11.90363457 | 5.653345188 | 0.009727311 | 866.7748555 | 15.31117745 |
| ZyE(35:1) | ZyE | 8.148915387 | 0.303040478 | 0.015036598 | 887.8578565 | 17.043 |
| ZyE(35:6) | ZyE | 27.50590747 | 4.733460694 | 0.001749322 | 894.8061555 | 15.67322165 |
| ZyE(37:6) | ZyE | 6.674761119 | 2.807572208 | 0.013366394 | 922.8374555 | 16.04933525 |
| Cer(m19:0_23:2) | Cer | 1.167054857 | 0.072798256 | 1.10375E-06 | 632.6340055 | 14.7165937 |

**Abbreviations:**VIP, variable influence on projection; Cal Mz, calculators mass to charge ratio; RT, retention time; Cer,

ceramides; CL, cardiolipin; FA, fatty acid; Hex1Cer, glucocerebroside; LPA, lysophosphatidic acid; LPC, lysophosphatidylcholine; LPE, lysophosphatidylethanolamine; OAHFA, (O-acyl)-1-hydroxy fatty acid; PA, phosphatidic acid; PC, phosphatidylcholine; PE, phosphatidylethanolamine; PI, phosphatidylinositol; PS, phosphatidylserine; SM,

sphingomyelin; SPHP, sphingosine phosphate; CerP, ceramides phosphate; ChE, cholesterol Ester; DG, diglyceride; LPG,

lysophosphatidylglycerol; MG, monoglyceride; PG, phosphatidylglycerol; SPH, sphingosine; TG, triglyceride; WE, wax exters; ZyE, zymosterol.
